# Supplementary material for: Laparoscopic cholecystectomy for acute cholecystitis: early or delayed? Evidence from a systematic review of discordant meta-analyses
Source: PubMed Central journal article supplement (PMC4907666; doi:10.1097/md.0000000000003835), 2016-06-10
Supplement: medi-95-e3835-s003.pdf [file medi-95-e3835-s003.pdf]

**ESM-TABLE 2.**  $I^2$  statistic or  $\chi^2$  value of each outcome, subgroup and sensitive analysis

| Items                        | Papi<br>(2004) | Siddiqui<br>(2008) | Gurusamy<br>(2013) | Zhou<br>(2014) | Cao<br>(2015) | Menahem<br>(2015) | Wu<br>(2015) |
|------------------------------|----------------|--------------------|--------------------|----------------|---------------|-------------------|--------------|
| Mortality                    |                |                    | NP                 | NP             | 0.0%          |                   |              |
| Bile duct injury             |                | NR                 | 28.0%              | 28.0%          | NR            | NR                | 0.0%         |
| Low risk of bias             |                |                    | 51.0%              |                |               |                   |              |
| High risk of bias            |                |                    | 28.0%              |                |               |                   |              |
| Less than 4 days             |                |                    | 0.0%               |                |               |                   |              |
| Less than 7 days             |                |                    | 0.0%               |                |               |                   |              |
| At least 50 LC or consultant |                |                    | 52.0%              |                |               |                   |              |
| Trainees without 50 LC       |                |                    | 28.0%              |                |               |                   |              |
| Best-best scenario           |                |                    | 25.0%              |                |               |                   |              |
| Best-worst scenario          |                |                    | 49.0%              |                |               |                   |              |
| Worst-best scenario          |                |                    | 24.0%              |                |               |                   |              |
| Worst-worst scenario         |                |                    | 18.0%              |                |               |                   |              |
| Bile leakage                 |                | NR                 |                    |                | 0.0%          | 0.0%              | 0.0%         |
| Overall complications        | 2.42           | 4.46               | 0.0%               |                | 50.8%         |                   | 67.0%        |
| Low risk of bias             |                |                    | 0.0%               |                |               |                   |              |
| High risk of bias            |                |                    | 0.0%               |                |               |                   |              |
| Less than 4 days             |                |                    | 0.0%               |                |               |                   |              |
| Less than 7 days             |                |                    | 22.0%              |                |               |                   |              |
| At least 50 LC or consultant |                |                    | 0.0%               |                |               |                   |              |
| Trainees without 50 LC       |                |                    | 0.0%               |                |               |                   |              |
| Best-best scenario           |                |                    | 0.0%               |                |               |                   |              |
| Best-worst scenario          |                |                    | 55.0%              |                |               |                   |              |
| Worst-best scenario          |                |                    | 0.0%               |                |               |                   |              |
| Worst-worst scenario         |                |                    | 35.0%              |                |               |                   |              |
| Wound infection              |                |                    |                    |                | 0.0%          |                   | 0.0%         |
| Quality of life              |                |                    |                    |                | NP            |                   | NP           |
| Patient satisfaction         |                |                    |                    |                |               |                   | NP           |
| Overall morbidity            |                |                    |                    | 56.0%          |               | NR                |              |
| Conversion to open surgery   | 0.68           | 1.84               | 0.0%               | 0.0%           | NR            | NR                |              |
| Low risk of bias             |                |                    | 0.0%               |                |               |                   |              |
| High risk of bias            |                |                    | 13.0%              |                |               |                   |              |
| Less than 4 days             |                |                    | 10.0%              |                |               |                   |              |
| Less than 7 days             |                |                    | 0.0%               |                |               |                   |              |

**Continued ESM-TABLE 2**

**ESM-TABLE 2.**  $I^2$  statistic or  $\chi^2$  value of each outcome, subgroup and sensitive analysis

| Items                                              | Papi<br>(2004) | Siddiqui<br>(2008) | Gurusamy<br>(2013) | Zhou<br>(2014) | Cao<br>(2015) | Menahem<br>(2015) | Wu<br>(2015) |
|----------------------------------------------------|----------------|--------------------|--------------------|----------------|---------------|-------------------|--------------|
| At least 50 LC or consultant                       |                |                    | 0.0%               |                |               |                   |              |
| Trainees without 50 LC                             |                |                    | 0.0%               |                |               |                   |              |
| Best-best scenario                                 |                |                    | 0.0%               |                |               |                   |              |
| Best-worst scenario                                |                |                    | 45.0%              |                |               |                   |              |
| Worst-best scenario                                |                |                    | 0.0%               |                |               |                   |              |
| Worst-worst scenario                               |                |                    | 7.0%               |                |               |                   |              |
| Duration of operation (min)                        |                | 0.44               | 76.0%              | 76.0%          | NP            | NR                | 30.0%        |
| Low risk of bias                                   |                |                    | 72.0%              |                |               |                   |              |
| High risk of bias                                  |                |                    | 0.0%               |                |               |                   |              |
| Less than 4 days                                   |                |                    | 0.0%               |                |               |                   |              |
| Less than 7 days                                   |                |                    | 84.0%              |                |               |                   |              |
| At least 50 LC or consultant                       |                |                    | 0.0%               |                |               |                   |              |
| Trainees without 50 LC                             |                |                    | 77.0%              |                |               |                   |              |
| Hospital stay (days)                               | NP             | 2.05               | 0.0%               | 0.0%           | NP            | 92.0%             | 76.0%        |
| Low risk of bias                                   |                |                    | 0.0%               |                |               |                   |              |
| High risk of bias                                  |                |                    | 0.0%               |                |               |                   |              |
| Less than 4 days                                   |                |                    | 0.0%               |                |               |                   |              |
| Less than 7 days                                   |                |                    | 0.0%               |                |               |                   |              |
| At least 50 LC or consultant                       |                |                    | 0.0%               |                |               |                   |              |
| Trainees without 50 LC                             |                |                    | 0.0%               |                |               |                   |              |
| Time of work days lost                             |                |                    | 0.0%               |                | NP            |                   | 52.0%        |
| Intra-abdominal fluid collection                   |                |                    |                    |                | NR            | NR                |              |
| Post-operative drainage                            |                |                    |                    |                |               | NR                |              |
| CBD injuries                                       | 0.00           |                    |                    |                |               |                   |              |
| CBD stones                                         | 1.00           |                    |                    |                |               |                   |              |
| Retained CBD stones                                | 0.00           |                    |                    |                |               |                   |              |
| Hospital costs                                     |                |                    |                    |                | NP            |                   | NP           |
| Gallstone-related morbidity<br>during waiting time |                |                    |                    | NP             |               |                   |              |
| Blood loss                                         |                |                    |                    |                | NR            |                   |              |
| Use of sub-hepatic drain                           |                |                    |                    |                | NR            |                   |              |

CBD, common bile duct; NP, not pooled; NR, not reported.
